# Supplementary material for: Influence of Lactic Acid Bacterium Strains on Changes in Quality, Functional Compounds and Volatile Compounds of Mango Juice from Different Cultivars during Fermentation
Source: MDPI journal article supplement (doi:10.3390/foods11050682), 2022-02-25
Supplement: s1 [file s1]

Table S1: Definition of attributes and references for the sensory evaluation of mango juice

| S/N | Attributes           | Description                                                                                                                                                | References                                                                                                                                       | Intensity                                                                |
|-----|----------------------|------------------------------------------------------------------------------------------------------------------------------------------------------------|--------------------------------------------------------------------------------------------------------------------------------------------------|--------------------------------------------------------------------------|
| 1   | Colour               | Perception of bright yellow of juice (5 to 10)<br>Perception of dark colour of juice (0 to 4)                                                              | Bright : whole fresh mango juice<br><br>Dark: Fresh mango juice + 0.6% food grade browning                                                       | Absent = 0<br>Dark yellow = 1-4<br>Average = 5-6<br>Bright yellow = 7-10 |
| 2   | Mango aroma /flavour | Characteristics aroma taste of mango (0 to 10)                                                                                                             | Characteristic: Undiluted fresh mango juice<br>Non-characteristics: undiluted mango juice stored at 55 °C for 24 days.                           | Absent =0<br>Weak = 1-4<br>Moderate = 5-6<br>Strong = 7-10               |
| 3   | Consistency          | Perception of viscosity product in the mouth (0 to 10)                                                                                                     | Weak = 1% diluted mango juice<br>Moderate = 50% diluted mango juice<br>Strong = 100% Fresh mango juice                                           | Absent =0<br>Weak = 1-4<br>Moderate = 5-6<br>Strong = 7-10               |
| 4   | Sweetness            | Perception of sweet taste on the tongue (0 to 10)                                                                                                          | Sucrose solution in water.<br>Weak = 2% sucrose solution<br>Moderate = 5% sucrose solution<br>Strong = 15% sucrose solution                      | Absent = 0<br>Weak = 1-4<br>Moderate = 5-6<br>Strong = 7-10              |
| 5   | Bitterness           | Perception of bitterness associated with caffeine or quinine solutions (0 to 10)                                                                           | Caffeine acid solution in water.<br>Weak = 0.5% caffeine solution<br>Moderate = 1% caffeine solution<br>Strong = 5% caffeine solution            | Absent = 0<br>Weak = 1-4<br>Moderate = 5-6<br>Strong = 7-10              |
| 6   | Sourness             | Perception of pungent, slightly sour characteristics of fermented fruits in the mouth or<br>Perception of acid or fermented taste on the tongue (0 to 10). | Citric acid solution in water.<br>Weak = 0.5% citric acid solution<br>Moderate = 0.1% citric acid solution<br>Strong = 0.5% citric acid solution | Absent = 0<br>Weak = 1-4<br>Moderate = 5-6<br>Strong = 7-10              |

|   |               |                                                        |                                          |                                                            |
|---|---------------|--------------------------------------------------------|------------------------------------------|------------------------------------------------------------|
| 7 | Acceptability | General acceptable attributes for a fermented product. | Fermented mango juice from each cultivar | Absent =0<br>Weak = 1-4<br>Moderate = 5-6<br>Strong = 7-10 |
|---|---------------|--------------------------------------------------------|------------------------------------------|------------------------------------------------------------|

**Table S2A.** Microbial counts in lactic acid bacteria fermented and unfermented 'Peach' mango juices

| 'Peach' mango juice | <i>Salmonella</i> spp. | <i>Shigella</i> spp. | <i>E. coli</i> | Coliform | Yeast and mold | Total aerobic bacteria |
|---------------------|------------------------|----------------------|----------------|----------|----------------|------------------------|
| PU 0 h              | nd                     | nd                   | nd             | nd       | nd             | nd                     |
| PU 2 h              | nd                     | nd                   | nd             | nd       | nd             | nd                     |
| PU 24 h             | nd                     | nd                   | nd             | nd       | 0,2 ± 0,01 h   | 3,5 ± 0.1 f            |
| PU 48 h             | nd                     | nd                   | nd             | nd       | 0,1 ± 0,01 hi  | 2,8 ± 0.1 g            |
| PU72 h              | nd                     | nd                   | nd             | nd       | 0,02 ± 0.1 i   | 1,7 ± 0.1 i            |
| L75 0 h             | nd                     | nd                   | nd             | nd       | nd             | nd                     |
| L75 2 h             | nd                     | nd                   | nd             | nd       | nd             | 8,26 ± 0,1 b           |
| L75 24 h            | nd                     | nd                   | nd             | nd       | 4,43 ± 0.11 a  | 9,33 ± 0.1 a           |
| L75 48 h            | nd                     | nd                   | nd             | nd       | 3,33 ± 0.11 c  | 7,53 ± 0.1 c           |
| L75 72 h            | nd                     | nd                   | nd             | nd       | 2,56 ± 0.05 d  | 4,56 ± 0.1 e           |
| L56 0 h             | nd                     | nd                   | nd             | nd       | nd             | nd                     |
| L56 2 h             | nd                     | nd                   | nd             | nd       | nd             | 6,56 ± 0.1 d           |
| L56 24 h            | nd                     | nd                   | nd             | nd       | 4,16 ± 0.05 a  | 8,33 ± 0,1 b           |
| L56 48 h            | nd                     | nd                   | nd             | nd       | 3,33 ± 0.11 c  | 4,53 ± 0.1 e           |
| L56 72 h            | nd                     | nd                   | nd             | nd       | 1,6 ± 0.05 e   | 2,53 ± 0.1 h           |
| L56+L75 0 h         | nd                     | nd                   | nd             | nd       | nd             | nd                     |
| L56+L75 2 h         | nd                     | nd                   | nd             | nd       | nd             | 4,56 ± 0.1 e           |
| L56+L75 24 h        | nd                     | nd                   | nd             | nd       | 3,3 ± 0.17 c   | 6,43 ± 0.1 d           |
| L56+L75 48 h        | nd                     | nd                   | nd             | nd       | 1,46 ± 0.05 f  | 2,43 ± 0.1 h           |
| L56+L75 72 h        | nd                     | nd                   | nd             | nd       | 0,56 ± 0.05 g  | 1,6 ± 0.1 i            |
| LSD                 |                        |                      |                |          | 0.16 **        | 0.01**                 |

Values with the same alphabetic letter along the column are not significantly different ( $p \leq 0.05$ ). Keys : U 0 h : Raw unfermented mango juice (control), U 24 h : Un-inoculated mango juice stored for 24 h ; *Ltp. plantarum* (L75); *Leu. pseudomesenteroides* (L56); *Leu. pseudomesenteroides* 56 + *Ltp. plantarum* 75 (L56+75); not detected (nd).

**Table S2B.** Microbial counts in lactic acid bacteria fermented and unfermented ‘Sabre’ mango juices

| ‘Sabre’ mango juice | <i>Salmonella</i> spp. | <i>Shigella</i> spp. | <i>E. coli</i> | <i>Coliform</i> | Yeast and mold | Total aerobic bacteria |
|---------------------|------------------------|----------------------|----------------|-----------------|----------------|------------------------|
| SU 0 h              | nd                     | nd                   | nd             | nd              | nd             | nd                     |
| SU 2 h              | nd                     | nd                   | nd             | nd              | nd             | nd                     |
| SU 24 h             | nd                     | nd                   | nd             | nd              | 0,3 ± 0.1 h    | 4,36 ± 0.23 g          |
| SU 48 h             | nd                     | nd                   | nd             | nd              | 0,23 ± 0.1 h   | 3,76 ± 0.05 h          |
| SU72 h              | nd                     | nd                   | nd             | nd              | 0,02 ± 01 i    | 2,73 ± 0.05 j          |
| L75 0 h             | nd                     | nd                   | nd             | nd              | nd             | nd                     |
| L75 2 h             | nd                     | nd                   | nd             | nd              | nd             | 8,63 ± 0.05 c          |
| L75 24 h            | nd                     | nd                   | nd             | nd              | 5,43 ± 0.11 a  | 9,83 ± 0.05 a          |
| L75 48 h            | nd                     | nd                   | nd             | nd              | 4,36 ± 0.05 c  | 8,46 ± 0.05 d          |
| L75 72 h            | nd                     | nd                   | nd             | nd              | 3,56 ± 0.05 d  | 5,46 ± 0.23 f          |
| L56 0 h             | nd                     | nd                   | nd             | nd              | nd             | nd                     |
| L56 2 h             | nd                     | nd                   | nd             | nd              | nd             | 7,53 ± 0.1 e           |
| L56 24 h            | nd                     | nd                   | nd             | nd              | 5,16 ± 0.05 b  | 9,33 ± 0.1 b           |
| L56 48 h            | nd                     | nd                   | nd             | nd              | 4,36 ± 0.05 c  | 5,53 ± 0.05 d          |
| L56 72 h            | nd                     | nd                   | nd             | nd              | 2,63 ± 0.05 e  | 3,56 ± 0.05 i          |
| L56+L75 0 h         | nd                     | nd                   | nd             | nd              | nd             | nd                     |
| L56+L75 2 h         | nd                     | nd                   | nd             | nd              | nd             | 5,53 ± 0.11 f          |
| L56+L75 24 h        | nd                     | nd                   | nd             | nd              | 4,36 ± 0.05 c  | 7,43 ± 0.05 e          |
| L56+L75 48 h        | nd                     | nd                   | nd             | nd              | 2,46 ± 0.05 f  | 3,43 ± 0.11 i          |
| L56+L75 72 h        | nd                     | nd                   | nd             | nd              | 1,63 ± 0.05 g  | 2,56 ± 0,05 k          |
| LSD                 |                        |                      |                |                 | 0.08 **        | 0.01**                 |

Values with the same alphabetic letter along the column are not significantly different ( $p \leq 0.05$ ). Keys : U 0 h : Raw unfermented mango juice (control), U 24 h : Un-inoculated mango juice stored for 24 h ; *Ltp. plantarum* (L75); *Leu. pseudomesenteroides* (L56); *Leu. pseudomesenteroides* 56 + *Ltp. plantarum* 75 (L56+75); not detected (nd).

**Table S2C.** Microbial counts in lactic acid bacteria fermented and unfermented ‘Tommy Atkins’ mango juices

| ‘Tommy Atkins’<br>mango juice | <i>Salmonella</i> spp. | <i>Shigella</i> spp. | <i>E. coli</i> | Coliform | Yeast and mold | Total aerobic bacteria |
|-------------------------------|------------------------|----------------------|----------------|----------|----------------|------------------------|
| TU 0 h                        | nd                     | nd                   | nd             | nd       | nd             | nd                     |
| TU 2 h                        | nd                     | nd                   | nd             | nd       | nd             | nd                     |
| TU 24 h                       | nd                     | nd                   | nd             | nd       | 0,10 ± 0.05i   | 2,46 ± 0.05 i          |
| TU 48 h                       | nd                     | nd                   | nd             | nd       | 0,08 ± 0.05 i  | 1,53 ± 0.05 k          |
| TU72 h                        | nd                     | nd                   | nd             | nd       | 0,01 ± 0.05 j  | 0,63 ± 0.01 l          |
| L75 0 h                       | nd                     | nd                   | nd             | nd       | nd             | nd                     |
| L75 2 h                       | nd                     | nd                   | nd             | nd       | nd             | 7,56 ± 0.5 b           |
| L75 24 h                      | nd                     | nd                   | nd             | nd       | 3,46 ± 0.05 a  | 8,4 ± 0.1 a            |
| L75 48 h                      | nd                     | nd                   | nd             | nd       | 2,36 ± 0.05 d  | 6,46 ± 0.1 d           |
| L75 72 h                      | nd                     | nd                   | nd             | nd       | 1,56 ± 0.05 e  | 3,56 ± 0.1 g           |
| L56 0 h                       | nd                     | nd                   | nd             | nd       | nd             | nd                     |
| L56 2 h                       | nd                     | nd                   | nd             | nd       | nd             | 5,56 ± 0.01 e          |
| L56 24 h                      | nd                     | nd                   | nd             | nd       | 3,23 ± 0.05 b  | 7,33 ± 0.01 c          |
| L56 48 h                      | nd                     | nd                   | nd             | nd       | 2,43 ± 0.05 c  | 3,46 ± 0.01 h          |
| L56 72 h                      | nd                     | nd                   | nd             | nd       | 0,63 ± 0.05 f  | 1,56 ± 0.01 k          |
| L56+L75 0 h                   | nd                     | nd                   | nd             | nd       | nd             | nd                     |
| L56+L75 2 h                   | nd                     | nd                   | nd             | nd       | nd             | 3,63 ± 0.05 g          |
| L56+L75 24 h                  | nd                     | nd                   | nd             | nd       | 2,43 ± 0.05 c  | 4,36 ± 0.05 f          |
| L56+L75 48 h                  | nd                     | nd                   | nd             | nd       | 0,53 ± 0.05 g  | 1,76 ± 0.05 j          |
| L56+L75 72 h                  | nd                     | nd                   | nd             | nd       | 0,36 ± 0.05 h  | 0,7 ± 0.05 l           |
| LSD                           |                        |                      |                |          | 0.06**         | 0.01**                 |

Values with the same alphabetic letter along the column are not significantly different ( $p \leq 0.05$ ). Keys : U 0 h : Raw unfermented mango juice (control), U 24 h : Un-inoculated mango juice stored for 24 h ; *Ltp. plantarum* (L75); *Leu. pseudomesenteroides* (L56); *Leu. pseudomesenteroides* 56 + *Ltp. plantarum* 75 (L56+75); not detected (nd).
